1  
2  
3  
4  
5 **Habitat fragmentation and food security**  
6  
7 **in crop pollination systems**  
8  
9

10  
11  
12 **Daniel Montoya<sup>a\*</sup>, Bart Haegeman<sup>a</sup>, Sabrina Gaba<sup>b,c</sup>, Claire De Mazancourt<sup>a</sup> &**  
13 **Michel Loreau<sup>a</sup>**  
14

15  
16 *<sup>a</sup> Centre for Biodiversity Theory and Modelling, Theoretical and Experimental Ecology*  
17 *Station, UMR 5321, CNRS, 09200 Moulis, France*

18 *<sup>b</sup> USC 1339, Centre d'Etudes Biologiques de Chizé, INRA, 79360 Villiers en Bois, France*

19 *<sup>c</sup> Centre d'Etudes Biologiques de Chizé, UMR 7372, CNRS & Université de La Rochelle,*  
20 *79360 Villiers en Bois, France*  
21

22  
23 **Author for correspondence:**

24 Daniel Montoya, ([daniel.montoya@sete.cnrs.fr](mailto:daniel.montoya@sete.cnrs.fr))

25 Tel: (+33) (0)673360487

26 Orcid: 0000-0002-5521-5282  
27

28  
29  
30 ***Abstract***  
31

32 Ensuring stable food supplies is recognized as a major challenge for the 21<sup>st</sup> century, and  
33 one of the UN Sustainable Development Goals. Biodiversity-based approaches to food  
34 security are increasingly being supported based on the fact that biodiversity can increase  
35 and stabilize crop yields. But agricultural systems are often highly fragmented and it is  
36 unclear how such fragmentation affects biodiversity and food production, limiting our  
37 capacity to manage agricultural landscapes for food security. Here, we develop a model  
38 of crop yield dynamics to investigate how fragmentation of natural habitats for  
39 agricultural conversion impacts food production, with a focus on crop pollination. Our  
40 results show that fragmentation produces spatial and biodiversity-mediated effects that  
41 affect the mean and stability of pollination-dependent crops, with strong consequences  
42 for food security. The net effects of fragmentation depend on the strength of the spillover  
43 of pollinators to crop land and the degree to which crops depend on animal pollination.  
44 Our study sheds new light in the food security debate by showing that high and stable  
45 yields depend on biodiversity and the spatial structure of agricultural landscapes, and by  
46 revealing the ecological mechanisms of food security in crop pollination systems.  
47

## 48 INTRODUCTION

49 Ensuring stable food supplies for a growing population is one of the UN Sustainable  
50 Development Goals<sup>1</sup>, and is a challenge that may require multiple solutions. Biodiversity-  
51 based approaches to food security suggest that safeguarding certain levels of species  
52 diversity is fundamental to increase yields and guarantee stable yields. This is supported  
53 by theory and data reporting positive effects of biodiversity on the mean values of various  
54 ecosystem functions and services<sup>2-6</sup>. Additionally, biodiversity can have a stabilizing  
55 effect on ecosystem service supply by providing an insurance against environmental  
56 fluctuations<sup>7</sup>, which are predicted to intensify under global change<sup>8-11</sup>. Biodiversity  
57 insurance effects have been observed in agriculture, where a greater diversity of crops in  
58 arable land is associated with increased year-to-year temporal stability of total yields<sup>12</sup>.  
59 However, most biodiversity in intensively-managed agricultural landscapes is found in  
60 the remaining fragments of (semi)natural habitat not converted into crop land, and the  
61 effects of such non-crop biodiversity on both the mean provision and stability of crop  
62 production are not clearly understood. This has led to a growing concern over the large-  
63 scale conversion of natural habitats into crop land and their effects on biodiversity and  
64 food production.

65 Agricultural systems are often highly fragmented with areas of intensive cultivation  
66 interspersed among remnant patches of seminatural habitat. This loss and fragmentation  
67 negatively affect biodiversity and many ecosystem functions and services<sup>13-15</sup>. Despite  
68 this, fragments of natural habitat continue to supply important services. The spatial  
69 coexistence of crops and natural land creates an opportunity for spillover effects<sup>16</sup>, a  
70 situation where ecological interactions extend across habitats boundaries and propagate  
71 ecological functions. In some cases, fragmentation can increase ecosystem service  
72 supply, e.g. if fragmentation of natural habitat for pollinators optimizes interspersions with  
73 crop land to maximize crop pollination<sup>17</sup>. But fragmentation can also reduce the provision  
74 of ecosystem services if biodiversity decreases significantly in the remnant fragments of  
75 natural habitat<sup>13-14</sup>. For most services, however, we do not know how fragmentation  
76 affects their provision in fragmented landscapes, and this limits our capacity to manage  
77 ecosystem service provision and food security in human-dominated landscapes.

78 Recent research has revealed strong and non-linear effects of land conversion on  
79 agricultural pollination services at multiple spatial scales<sup>18-20</sup>. For example, there is  
80 consensus on the hump-shaped relationship between the pollinator-dependent component  
81 of crop production and the fraction of remnant natural land within intensive farming  
82 systems<sup>20,21</sup>. Research on the stability of crop production shows that yield stability  
83 decreases with agricultural intensification and the degree to which crops depend on  
84 animal pollination<sup>22-25</sup>. Changes in crop yield stability of animal-pollinated crops are also  
85 dependent on the spatial composition and structure of agricultural landscapes, such as the  
86 amount of remnant natural land cover<sup>20,26</sup> and the isolation of crops from natural land<sup>23</sup>.  
87 Overall, these studies suggest that improved management of agricultural landscape  
88 should increase the amount and stability of production for pollination-dependent crops,  
89 and that an understanding of how the spatial pattern of land conversion – i.e.  
90 fragmentation – impacts ecosystem services is key to achieve this goal. However, none  
91 of these studies have simultaneously combined several ecosystem services, crop yield  
92 dynamics at different scales and spatially-explicit landscapes to investigate the effects of  
93 land conversion on biodiversity and the provision and stability of ecosystem services in  
94 agricultural landscapes.

95

96 There is general consensus that increased food production is necessary, but not sufficient,  
97 to achieve food security<sup>27</sup>, and that agriculture, especially in the global change context,  
98 should also aim at stabilizing crop yields over time<sup>26,28</sup>. Bearing this in mind, we here  
99 extend a model of crop yield dynamics into a spatially-explicit landscape to investigate  
100 how habitat loss and fragmentation, i.e. the amount and spatial configuration of  
101 seminatural habitat, influence the mean provision and stability of several ecosystem  
102 services in agricultural landscapes. We focus on crop pollination systems because (i) crop  
103 pollination is a key agricultural service that depends on biodiversity, and (ii) worldwide  
104 agriculture is shifting towards more pollinator-dependent food production systems<sup>29,30</sup>.  
105 Because the way food is produced worldwide threatens the existence of much of the  
106 world's biodiversity that contributes to crop pollination and food security, we explore  
107 how changes in biodiversity following land conversion affect the supply of various  
108 ecosystem services in fragmented agroecosystems. Specifically, we address two  
109 questions: (i) How does the spatial pattern of land conversion, i.e. loss and fragmentation  
110 of natural habitat, influence the provision and stability of crop pollination services in  
111 agroecosystems? (ii) How does biodiversity in fragmented landscapes influence crop  
112 pollination and food security?

113

114

## 115 **METHODS**

116

### 117 *a. Spatial agroecosystem model*

118

119 We developed a model to investigate the expected biodiversity (i.e. species richness), crop  
120 production at the farm level (i.e. crop yield per area) and landscape crop production (i.e.  
121 the magnitude and stability of crop pollination and independent crop yield) in agricultural  
122 landscapes with varying degrees of fragmentation and for different crop types (i.e.  
123 different levels of animal pollination dependence), yielding a total of six ecosystem  
124 service components. In what follows, we describe the model dynamics and the land  
125 conversion pattern generation. A conceptual representation of our model is provided in  
126 Figure 1.

127

128

129 **Figure 1.** Conceptual diagram of our modelling framework. Green boxes represent non-  
130 spatial components of the model, whereas blue boxes are the additions that space brings  
131 to the model. Considering space allows: (i) to explore a continuous gradient of land  
132 conversion patterns, from completely random to highly aggregated, that encompasses a  
133 wide range of fragmentation scenarios, and (ii) to vary the strength of the spillover effect  
134 from seminatural habitat to crop land – i.e. the distance-decay of ecosystem service flows.  
135 Following a mean-field approximation, the *Mean Pollinator Potential* (MPP) of the  
136 agricultural landscape captures the full complexity of fragmentation effects of land  
137 conversion on ecosystem service supply that are not mediated by biodiversity (see  
138 results).  
139  
140

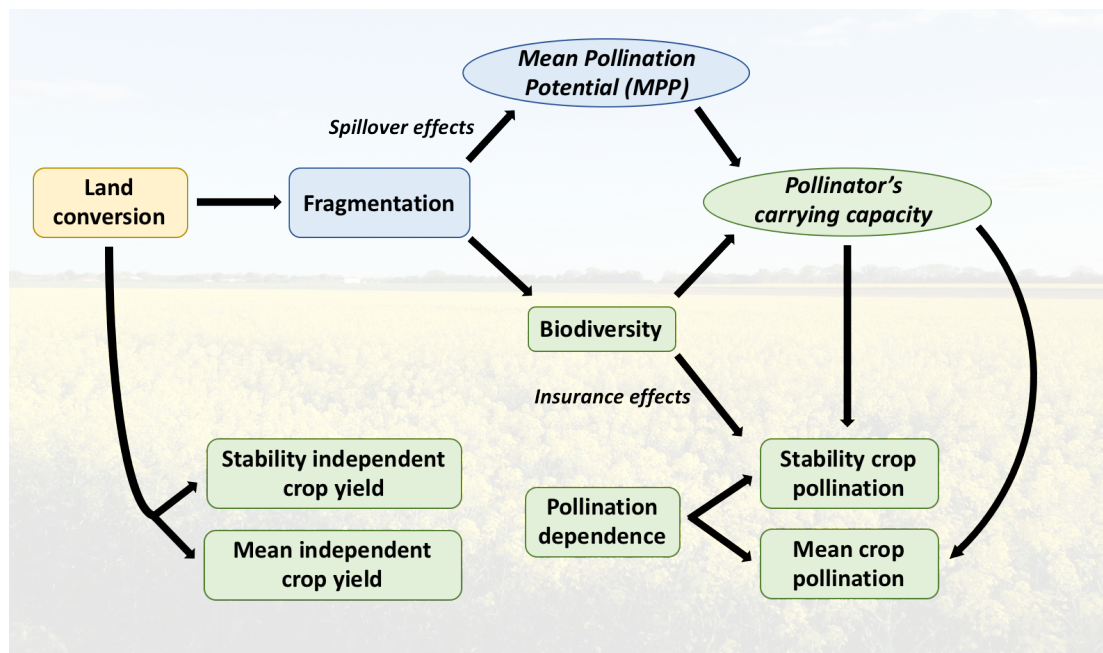

141  
142  
143

144 *Crop dynamics.* We used a model of biodiversity and crop biomass production in  
 145 agricultural systems<sup>20</sup>, and extend it to a spatially-explicit landscape to investigate the  
 146 response of ecosystem services to land conversion. The model represents intensively-  
 147 managed agricultural landscapes, where crop land does not harbor significant levels of  
 148 biodiversity. Spatial heterogeneity is defined by two types of patches: crop land and  
 149 seminatural habitat. Crop land is used to grow annual crops with varying degrees of  
 150 dependence on wild animal pollination, whereas seminatural habitat shelters biodiversity,  
 151 including wild plants and pollinators. The model does not take managed honey bees into  
 152 account as they do not depend on the availability of seminatural habitat, and they pollinate  
 153 less efficiently compared to non-managed pollinators<sup>31</sup>. Crop land and seminatural habitat  
 154 are linked by pollinators' foraging movement. The three components of Montoya et al<sup>20</sup>  
 155 (pollinators, wild plants, and crop yield) are represented by the following equations (they  
 156 have been transformed into their spatially-explicit, discrete-time versions):  
 157

$$158 \quad P_k(t+1) = P_k(t) \exp(r_{P,k}(t) \left(1 - \frac{P_k(t)}{k_P A_1}\right)) + \sigma_P^e u_P^e(t) P_k(t) + \frac{\sigma_P^d u_P^d(t)}{\sqrt{P_k(t)}} P_k(t) \quad (1)$$

$$159 \quad W_k(t+1) = W_k(t) \exp(r_{W,k}(t) \left(1 - \frac{W_k(t)}{k_W A_1}\right)) + \sigma_W^e u_W^e(t) W_k(t) + \frac{\sigma_W^d u_W^d(t)}{\sqrt{W_k(t)}} W_k(t) \quad (2)$$

$$160 \quad C_k(t) = A_1 [Z_C + r_{C,k}(t)] (1 + \sigma_C^e u_C^e(t)) \quad (3)$$

161 where  $P_k$  represents pollinators,  $W_k$  wild plants and  $C_k$  crop yield in cell  $k$ , with  $P_k(t) =$   
 162  $W_k(t) = 0$  if  $k$  is a crop land cell, and  $C_k(t) = 0$  if  $k$  is seminatural habitat. One unit of  
 163 time  $t$  corresponds to one growing season,  $P(t)$  and  $W(t)$  can be interpreted as total  
 164 biomass of pollinators and wild plants over growth season  $t$ , respectively, whereas  $C(t)$  is  
 165 the total crop yield at the end of the growing season  $t$ .  $L$  is the set of crop land cells;  $k_P$   
 166 and  $k_W$  are the carrying capacities of pollinators and 'wild' plants, respectively, per unit  
 167 area.  $A_l$  is the area of a single cell;  $A$  is total landscape area;  $A[1-\omega_{sn}]$  is the total crop land  
 168 area, and  $A\omega_{sn}$  is total seminatural area.  $\sigma_P^e, \sigma_P^d$  are the environmental and demographic  
 169 stochasticity of pollinators, and  $\sigma_C^e$  is the environmental stochasticity of crops. Equation  
 170 (3), is the sum of pollination-dependent and independent parts of crop yield:  
 171  
 172  
 173  
 174

$$175 \quad \text{Independent crop yield: } C_{i_k}(t) = A_1 Z_C (1 + \sigma_C^e u_C^e(t)) \quad (4)$$

$$176 \quad \text{Crop pollination: } C_{d_k}(t) = A_1 r_{C,k}(t) (1 + \sigma_C^e u_C^e(t)) \quad (5)$$

177  
 178 In the equations (1-3),  $r_{P,k}(t)$ ,  $r_{W,k}(t)$ ,  $r_{C,k}(t)$  are the pollinators', 'wild' plants' and crop's  
 179 per capita growth rates, and are defined as:  
 180  
 181

$$182 \quad r_{P,k}(t) = \frac{\alpha_P \left[ \frac{\sum_{l \notin L} \varepsilon_{kl} W_l(t) + \sum_{l \in L} \varepsilon_{kl} C_l(t)}{A} \right]}{\beta_P + \frac{\sum_{l \notin L} \varepsilon_{kl} W_l(t) + \sum_{l \in L} \varepsilon_{kl} C_l(t)}{A}} \quad (6)$$

$$183 \quad r_{W,k}(t) = \frac{\alpha_W \left( \frac{\sum_{l \notin L} \varepsilon_{kl} P_l(t)}{A} \right)}{\beta_W + \frac{\sum_{l \notin L} \varepsilon_{kl} P_l(t)}{A}} \quad (7)$$

$$184 \quad r_{C,k}(t) = \frac{\alpha_C \left[ \frac{\sum_{l \notin L} \varepsilon_{kl} P_l(t)}{A} \right]}{\beta_C + \frac{\sum_{l \notin L} \varepsilon_{kl} P_l(t)}{A}} \quad (8)$$

187

188 , where  $\varepsilon_{kl}$  the distance-decay function representing the decrease of ecosystem service  
189 flow from seminatural habitat to crop land (see below). Pollinators are assumed to be  
190 generalist central-place foragers that feed on both wild plants and crops<sup>32</sup>, and pollinator's  
191 growth rate thus depends on the availability of resources (wild plants and crops) in the  
192 neighborhood. The growth rate of wild plants does not depend on crops. Plant and  
193 pollinator uptake of resources follows a saturating, type II functional response, where  $\alpha_P$   
194 and  $\alpha_W$  are the maximum growth rates;  $\beta_P$  and  $\beta_W$  are half-saturation constants. The  
195 pollination-dependent part of crop yield is also assumed to follow a type II functional  
196 response (Eq. 5 and 8), where  $\alpha_C$  is the maximum crop yield derived from pollination,  
197 and  $\beta_C$  is the half-saturation constant of crops. The use of saturating functional responses  
198 is widely supported and consistent with real biological examples<sup>33-35</sup>. A complete  
199 description of the model parameters can be found in Table S1.

200

201 Ecosystem service provision at the landscape scale is estimated by summing up the  
202 individual contribution of each cell  $k$ . Thus, for total crop yield we obtained  $C(t) =$   
203  $\sum_{k \in L} C_k(t)$ . Crop yield per unit of agricultural area is calculated by dividing total crop  
204 yield by crop land area.

205

206 *Distance-decay of ecosystem service flow.* One main feature of space, as opposed to  
207 spatially-implicit or non-spatial systems, lies in the distance-decay of service flows from  
208 one habitat to another. For ecosystem service flow, we used a logistic distance-decay  
209 function adapted from Mitchell et al<sup>19</sup>. This function is consistent with both theoretical  
210 predictions<sup>16,36-39</sup> and empirical observations<sup>40-42</sup> of the effects of habitat edges and  
211 distance-to-habitat fragment gradients on ecosystem service provision. Other functions  
212 are possible and biologically meaningful (e.g. exponential decay), but they yield similar  
213 results (Mitchell et al<sup>19</sup>; Figure S1).

214

215 In our model, ecosystem service distance-decay mainly affects the flow of pollination to  
216 crop land.  $\varepsilon_{kl}$  is the distance-decay function of the effect pollinators on crops: the further  
217 a crop land cell is from seminatural habitat, the more difficult it is for pollinators to reach  
218 that cell, and thus the smaller the effect of  $P_k$  on crop biomass. To calculate  $\varepsilon_{kl}$ , we adapt  
219 Mitchell et al<sup>19</sup> distance-decay function as follows (see also Appendix S1):

220

$$221 \quad \varepsilon_{kl} = \frac{1+\beta}{1+\beta \exp(\alpha d_{kl})}, \text{ with} \quad (9)$$

222

$$223 \quad d_m = \frac{1}{\alpha} \ln \frac{0.5+\beta}{0.5\beta} \quad \text{and} \quad \Delta d = \frac{1}{\alpha} \ln \frac{8.1+9\beta}{0.1+\beta}$$

224

225 , where  $d_{kl}$  is the distance between cells  $k$  and  $l$ , and parameters  $\alpha$  and  $\beta$  are auxiliary  
226 parameters determined by

227

$$228 \quad d_m = \frac{1}{\alpha} \ln \frac{0.5+\beta}{0.5\beta} \quad \text{and} \quad \Delta d = \frac{1}{\alpha} \ln \frac{8.1+9\beta}{0.1+\beta}$$

229

230 , where  $d_m$  is the distance from seminatural cell edge at which the pollination flow equals  
231 one half of its initial value – 50% decay distance –, and  $\Delta d$  is the distance over which the  
232 pollination flow decreases from 90% to 10% of its initial value – 90% to 10% decay  
233 distance. The total contribution of animal pollination to crop yield in a given cell  $k$  is  
234 made up from the summed contributions of individual seminatural habitat cells in the

235 surrounding landscape. We explored a range of  $d_m$  values to investigate how variations in  
236 distance-from-fragment where service flow decreases influence ecosystem service  
237 supply. Variation in  $\Delta d$  had little effect on model results (Figure S2; see also Mitchell et  
238 al<sup>19</sup>).

239  
240 Stochasticity. To investigate the effects of land conversion pattern on yield stability, our  
241 model includes environmental and demographic stochasticity. Environmental  
242 stochasticity (e.g. variation in temperature, rainfall variability) is included through the  
243 terms  $\sigma^e u^e(t)$ , where  $(\sigma^e)^2$  is the environmental variance of either pollinators  $((\sigma_P^e)^2)$ ,  
244 ‘wild’ plants  $((\sigma_W^e)^2)$  or crops  $((\sigma_C^e)^2)$ , and  $u^e(t)$  are random functions with zero mean and  
245 standardized variance; we assume that perturbations have no temporal correlation.  
246 Demographic stochasticity  $(\sigma^d u^d(t))$  emerges from stochastic variation in individuals’  
247 births and deaths. Crops are sown at high densities, and thus we assume demographic  
248 stochasticity is prevented in crops, and only affects pollinators and ‘wild’ plants.  
249 Demographic stochasticity is included in the form of the first-order normal approximation  
250 commonly used in stochastic population dynamics<sup>43</sup>, where  $(\sigma^d)^2$  is the demographic  
251 variance of either pollinators  $((\sigma_P^d)^2)$  or ‘wild’ plants  $((\sigma_W^d)^2)$ , and  $u^d(t)$  are independent  
252 random functions with zero mean and standardized variance. For environmental  
253 stochasticity, we take the same perturbation for all cells and for all variables (because  
254 weather variations will be more or less the same over the entire landscape). For  
255 demographic stochasticity, we take independent perturbations between cells and  
256 variables.

257  
258 Biodiversity and fragmentation. Despite recent debate has ensued on the relative  
259 importance of habitat loss *versus* fragmentation on species diversity<sup>15,44-46</sup>, empirical  
260 evidence shows that larger and more connected fragments of natural habitat in general  
261 host more biodiversity than smaller and more isolated fragments<sup>14</sup>. In agricultural  
262 landscapes, this means that different land conversion patterns (e.g. random, aggregated)  
263 will result in different biodiversity levels which will in turn influence ecosystem service  
264 supply in many ways. Hanski et al<sup>47</sup> proposed a way to capture the relationship between  
265 biodiversity and habitat fragmentation, namely the *Species-Fragmented Area*  
266 *Relationship* (SFAR), which extends the conventional species-area relationship (SAR) to  
267 landscapes where fragmentation pervades. The SFAR has the following form:

$$268 \quad S = c_s (A \omega_{sn})^{z_s} e^{-b/\lambda_M} \quad (10)$$

270  
271 , where  $S$  is pollinator diversity – species richness –, and  $A \omega_{sn}$  is the total area of  
272 seminatural habitat;  $b$  is a parameter modulating the effect of the metapopulation capacity  
273 and reflects the ability of species to live in fragmented landscapes (e.g. low  $b$   
274 characterized species evolved or well adapted to live in fragmented landscapes). The  
275 degree of fragmentation is captured by  $\lambda_M$ , which represents the metapopulation capacity  
276 of the fragmented landscape. The metapopulation capacity  $\lambda_M$  is obtained from the leading  
277 eigenvalue of a  $n \times n$  matrix with elements  $m_{ii} = 0$  and  $m_{ij} = A_i^x A_j^y f(d_{ij})$ , where  $A_i$  and  $A_j$   
278 are the areas of fragments  $i$  and  $j$ ,  $x$  and  $y$  are scaling factors (we use  $x = 2$ ,  $y = 1$  as in  
279 Hanski et al<sup>47</sup>),  $d_{ij}$  is the Euclidean distance between the centroids of fragments  $i$  and  $j$ ,  
280 and  $f(d_{ij})$  is the dispersal kernel. Following Hanski et al (2013), we assume the exponential  
281 dispersal kernel with a cutoff at 0.01,  $f(d_{ij}) = \max\{\exp(-\delta d_{ij}), 0.01\}$ , where  $1/\delta$  gives the  
282 average dispersal distance, and estimated  $\lambda_M$  from information on fragment size and  
283 distance among fragments (all referred to seminatural habitat). We used the accepted  
284 value of  $z_s = 0.25$  for a wide range of plants and animals<sup>48</sup>, and allowed dispersal distance

285 and  $b$  to vary.

286

287 Changes in landscape structure can affect biodiversity and the ecosystem functions that  
288 underlie ecosystem service provision. To consider the effects of fragmentation on  
289 biodiversity and crop pollination, we made crop pollination dependent on pollinator  
290 diversity. This was done by creating a dependence of pollinator's carrying capacity ( $k_P$ )  
291 on biodiversity following a power law:  $k_P = c_{k_P} S^{z_{k_P}}$ , where  $S$  is the number of pollinator  
292 species estimated by the SFAR, and  $c_{k_P}$ ,  $z_{k_P}$  are the parameters of the power law. We use  
293 the values of  $c_{k_P}=1$  and  $z_{k_P}=0.26$  based on recent literature<sup>49-51</sup>, but also considered two  
294 extreme values of  $h$  (0.0, 0.5) to more clearly explore the effect of pollinator diversity.  
295 Finally, we considered the ability of pollinator diversity to provide an insurance against  
296 environmental fluctuations, i.e. insurance effect of biodiversity. To do this, we made  $\sigma_P^e =$   
297  $e_P/S^q$ , and compared a scenario where environmental stochasticity depends on  
298 biodiversity ( $q = 1/2$ )<sup>52</sup> with another scenario where biodiversity does not affect  
299 environmental stochasticity ( $q = 0$ ). Demographic stochasticity acts at the individual  
300 level, and in the same manner for conspecifics and heterospecifics; thus, there is no  
301 insurance effect for demographic stochasticity.

302

### 303 ***b. Land conversion pattern generation***

304

305 The landscape consisted of two-dimensional lattice ( $25 \times 25$  cells) where individual cells  
306 can have either of two states: crop land or seminatural habitat. We generated land  
307 conversion patterns by iteratively creating crop land cells in a landscape that consisted  
308 initially only of seminatural land. In a single step of the algorithm only one semi-natural  
309 habitat cell is selected and converted. At each iteration, we determined for each  
310 seminatural land cell the number of neighboring crop land cells, a number we denote by  
311  $m$  ( $m$  is equal to 0, 1, 2, 3 or 4). We then chose randomly one of the seminatural land cells,  
312 with a probability that depended on the number of neighboring crop land cells. More  
313 precisely, the probabilities were proportional to  $p = 0.1^w$  if  $m = 0$  and  $p = m^w$  if  $m \geq$   
314 1. These values are actually relative probabilities; that is, they have to be normalized to  
315 get the probability of selecting a given cell. Hence, for  $w = 0$  all seminatural land cells  
316 had the same relative probability to be chosen, leading to a fully random, unclustered  
317 pattern. For  $w > 0$ , seminatural land cells with more neighboring crop land cells had a  
318 higher relative probability to be converted, leading to a clustered or aggregated pattern.  
319 Larger values of  $w$  resulted in more aggregated patterns. Therefore, variation in the value  
320 of  $w$  allowed us to produce a continuous gradient of land conversion patterns, and  
321 therefore fragmentation, based on the aggregation degree (Figure S3). For each land  
322 conversion pattern, we characterised fragmentation of the remaining seminatural habitat  
323 by quantifying mean fragment size, number of fragments, mean fragment perimeter, and  
324 perimeter: area ratio.

325

326

## 327 **RESULTS**

328

### 329 *Mean-field approximation*

330 Because the spatially explicit model demands much computational time, we analysed  
331 how the spatially-explicit model is linked to the spatially-implicit one. To do so, we  
332 developed a mean-field approximation of the spatial agroecosystem model (Eqs. 1-3),  
333 which replaces the detailed spatial structure of the landscape by a much simpler, spatially



334 averaged one (see Appendices S2 and S3 for further details on the solution of the full  
 335 model and the derivation of the mean-field approximation). To do this, consider the sums  
 336  $\sum_{l \notin L} \varepsilon_{kl}$  (Eq. 8): there are  $\omega_{sn} n^2$  terms (possible values of  $l$ ;  $n^2$  is the number of cells in  
 337 the agricultural landscape), and  $(1 - \omega_{sn}) n^2$  such sums (possible values of  $k$ ). It turns out  
 338 that the main effects of the spatial structure can be accounted for by a new parameter,  $\bar{\varepsilon}$ ,  
 339 defined as

$$340 \quad \bar{\varepsilon} = \frac{1}{(1 - \omega_{sn}) n^2} \frac{1}{\omega_{sn} n^2} \sum_{k \in L, l \notin L} \varepsilon_{kl} \quad (11)$$

342  $\bar{\varepsilon}$  is the average value of  $\varepsilon_{kl}$  when taking a random cell  $k \in L$  and a random cell  $l \notin L$ .  $\bar{\varepsilon}$   
 343 has two complementary interpretations. Firstly, it is a measure of the amount of  
 344 seminatural habitat supplying pollinators to crop land: if we multiply  $\bar{\varepsilon}$  by the area of  
 345 seminatural habitat ( $R_{SNH} = \omega_{sn} A \bar{\varepsilon} = \omega_{sn} n^2 A_1 \bar{\varepsilon}$ ), then  $R_{SNH}$  is the area from which a  
 346 crop land cell can be pollinated averaged over all crop land cells. Secondly,  $\bar{\varepsilon}$  quantifies  
 347 the amount of crop land that is reachable by pollinators from seminatural habitat: if we  
 348 multiply  $\bar{\varepsilon}$  by the crop land area ( $R_C = (1 - \omega_{sn}) n^2 A_1 \bar{\varepsilon}$ ),  $R_C$  is the crop land  
 349 area that a pollinator can reach averaged over all seminatural cells. Taken together, these  
 350 two interpretations can be summarized by the term *Mean Pollination Potential* (MPP;  $0$   
 351  $\leq \text{MPP} \leq 1$ ). Under the mean-field approximation the mean crop yield is (see Appendix  
 352 S3):

$$353 \quad C^* \approx (1 - \omega_{sn}) A \left( Z_C + \frac{\alpha_C \bar{\varepsilon} k_P \omega_{sn}}{\beta_C + \bar{\varepsilon} k_P \omega_{sn}} \right) \quad (12)$$

354  
 355  
 356 The variance of crop yield is:

$$357 \quad \text{Var}(C) \approx \frac{((1 - \omega_{sn}) \alpha_C \beta_C)^2}{(\beta_C + \bar{\varepsilon} k_P \omega_{sn})^4 \alpha_C (1 - \alpha_C)} \left( (\sigma_P^e \bar{\varepsilon} k_P \omega_{sn} A)^2 + ((\sigma_P^d \bar{\varepsilon})^2 k_P \omega_{sn} A) \right) + (\sigma_C^e C^*)^2 \quad (13)$$

358  
 359  
 360 , with  $k_p = a S^h$  (see methods). We found that the mean-field approximation is a very  
 361 accurate description of the dynamics of various ecosystem services in agricultural  
 362 landscapes, both for mean and stability values (Figure 2).  
 363  
 364  
 365  
 366

367 **Figure 2.** Mean-field approximation vs Exact solution. **(a)** Mean crop pollination. **(b)**  
368 Variability of crop pollination (measured as Coefficient of Variation – CV –, the inverse  
369 of stability). Exact solution equations can be found in Appendix 2 (Eqs. 8 and 17 for crop  
370 pollination mean and variability, respectively). Mean-field results are derived from Eqs.  
371 12 and 13 in the main text, for mean and variability of crop pollination, respectively.  $\omega_{sn}$   
372 is the proportion of seminatural habitat (drawn randomly in  $[0,5]$ , Figure S3).  $d_m$  = drawn  
373 randomly in  $[1,25]$ , expressed in linear dimension of a landscape cell,  $z_{kp} = 0.26$ .  
374 Parameter values:  $\alpha_P = \alpha_W = 0.9$ ,  $\beta_P = \beta_W = 0.6$ ,  $A = 10$ ,  $Z_C = 1000$ ,  $\alpha_C = 1000$ ,  $k_W = 5000$ ,  
375  $k_P = 0.1$ ,  $e_P = 0.8$ ,  $\sigma^d_P = 0.1$ ,  $\sigma^e_C = 0.03$ ,  $\alpha_C = 1000$ , Pollination dependence = 50%.  
376  
377

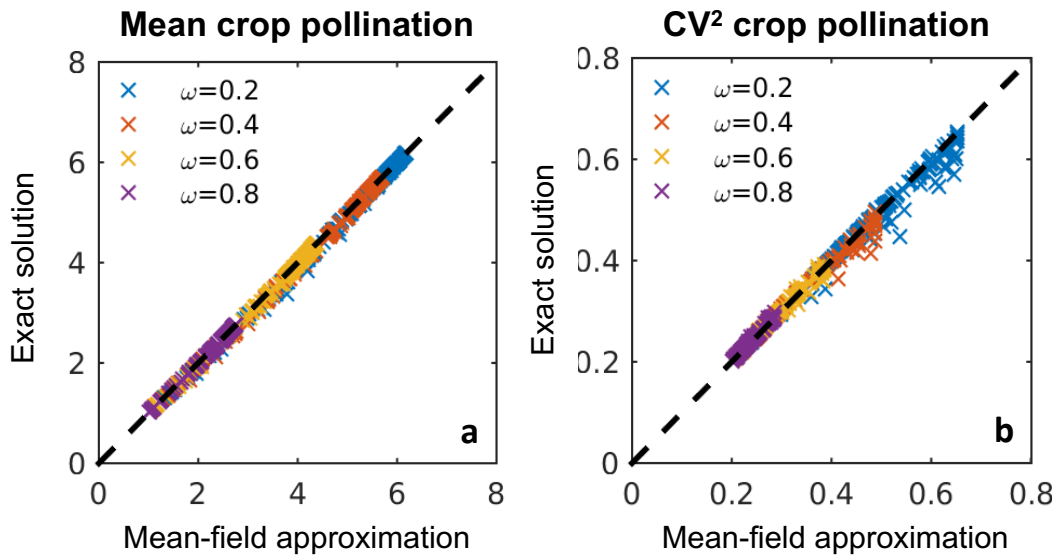

378  
379

380 The mean-field approximation shows that the fragmentation effects of land conversion  
381 on crop pollination services are determined by MPP. To consider the spatial structure of  
382 land conversion, the term  $\beta_C/k_P$  of the non-spatial model<sup>20</sup> has to be replaced by

$$384 \frac{1}{\bar{\epsilon}} \frac{\beta_C}{k_P} = \frac{\omega_{sn} A}{R_{SNH}} \frac{\beta_C}{k_P} = \frac{(1-\omega_{sn}) A}{R_C} \frac{\beta_C}{k_P} \quad (14)$$

385  
386  $\beta_C/k_P$  is the ratio of crop half-saturation constant relative to pollinators' carrying capacity,  
387 and is an *effective* parameter combination that strongly influences crop dynamics, as it  
388 quantifies the pollinator requirement of crops relative to the availability of pollinators,  
389 i.e. crop relative requirement for pollinators. When  $\beta_C/k_P$  is small, crop yield saturates at  
390 lower pollinator biomass than their carrying capacity; when  $\beta_C/k_P$  is large, crop yield  
391 saturates at pollinator biomasses much higher than their carrying capacities.  $\beta_C/k_P$   
392 influences both the mean and stability of crop pollination. On one hand, greater values of  
393  $\beta_C/k_P$  increase the effect of pollinator biomass on crop pollination, reducing mean yield  
394 and shifting maximum yield to larger amounts of seminatural habitat. On the other hand,  
395  $\beta_C/k_P$  controls how fast the saturation of crop pollination to pollinator biomass sets in and,  
396 consequently, how fast the response of crops to pollinator stochasticity drops down; thus,  
397 the smaller  $\beta_C/k_P$  the faster the saturation sets in, and so the faster crop yield variability  
398 drops when increasing seminatural habitat (Figure S4A). Without distance-decay (or  
399 when  $MPP \approx 1$ ), the spatial model collapses into the non-spatial model (Figure 3A-C,  
400 dark blue lines; Figure S4B). Fragmentation effects on ecosystem services become  
401 stronger when  $MPP < 1$ , which increases  $\beta_C/k_P$ .

#### 402 403 Spatial constraints/ fragmentation effects on MPP

404 MPP depends on two factors: fragmentation – more specifically, the aggregation pattern  
405 of land conversion – and the distance-decay of ecosystem service flow. High aggregation  
406 (low fragmentation) and fast distance-decay result in lower MPP (Figures S5 and S6),  
407 which in turn reduce crop pollination services. These two factors interact: only when the  
408 flow of pollinators to crop land is limited (fast distance-decay) aggregation patterns are  
409 relevant for crop production (Figure S5A-D). In this case, higher aggregation, through its  
410 effects on MPP, not only reduces mean crop pollination and shifts maximum yield to  
411 higher fractions of seminatural habitat, but also decreases yield stability along the  
412 gradient of seminatural habitat (Figure 3A, B). When no restrictions exist in the flow of  
413 pollinators to crop land, MPP is maximum ( $MPP \approx 1$ ; Figure 3) and fragmentation does  
414 not affect pollination services (Figure S5E-F).

#### 415 416 MPP effects on ecosystem services

417 We did not find any clear, consistent effect of specific fragmentation metrics on  
418 ecosystem services (Figure S7). However, the full complexity of the purely spatial  
419 fragmentation effects (i.e. those not mediated by biodiversity) on ecosystem service  
420 supply, irrespective of the specific pattern of land conversion, were captured by MPP  
421 (Figure S8). When  $MPP = 1$ , fragmentation effects are negligible and crop dynamics are  
422 identical to those of the non-spatial model (Figure 3A-C, dark blue lines). In this case, no  
423 additional mechanisms need to be invoked: crop yield dynamics are driven by the crop's  
424 relative requirement for pollinators ( $\beta_C/k_P$ , Figure S4) and the degree to which crops  
425 depend on animal pollination. The effects of fragmentation kick off when  $MPP < 1$ .  
426 Lower MPP – i.e. more aggregated patterns of land conversion (Figure S5) – reduces the  
427 carrying capacity of pollinators (Eq. 14), which decreases the provision of pollinator-  
428 dependent ecosystem services (Figure 3A-C). The same is true for crop pollination  
429 stability, except at small fractions of seminatural habitat and/or small values of MPP. A

430 higher biodiversity effect (larger  $z_{kp}$ ) increases both mean crop pollination and its  
431 stability, as well as yield per area (Figure S9). MPP has no effect on independent crop  
432 yield as it does not depend on animal pollination and, therefore, on seminatural habitat  
433 (Figure 3D-E).  
434  
435  
436

437 **Figure 3.** Effects of landscape composition and MPP on ecosystem services. Ecosystem  
438 services are represented as a function of the proportion of seminatural habitat, for  
439 different MPP. MPP includes the effects of fragmentation – more specifically, the  
440 aggregation pattern of land conversion – and the distance-decay of ecosystem service  
441 flow. Parameter values:  $\alpha_P = \alpha_W = 0.9$ ,  $\beta_P = \beta_W = 0.6$ ,  $A = 10$ ,  $Z_C = 1000$ ,  $\alpha_C = 1000$ ,  $k_W =$   
442  $5000$ ,  $e_P = 0.8$ ,  $\sigma_P^d = 0.1$ ,  $\sigma_C^e = 0.03$ ,  $\alpha_C = 1000$ , Pollination dependence = 50%,  $z_{k_P} =$   
443  $0.26$ .  
444  
445

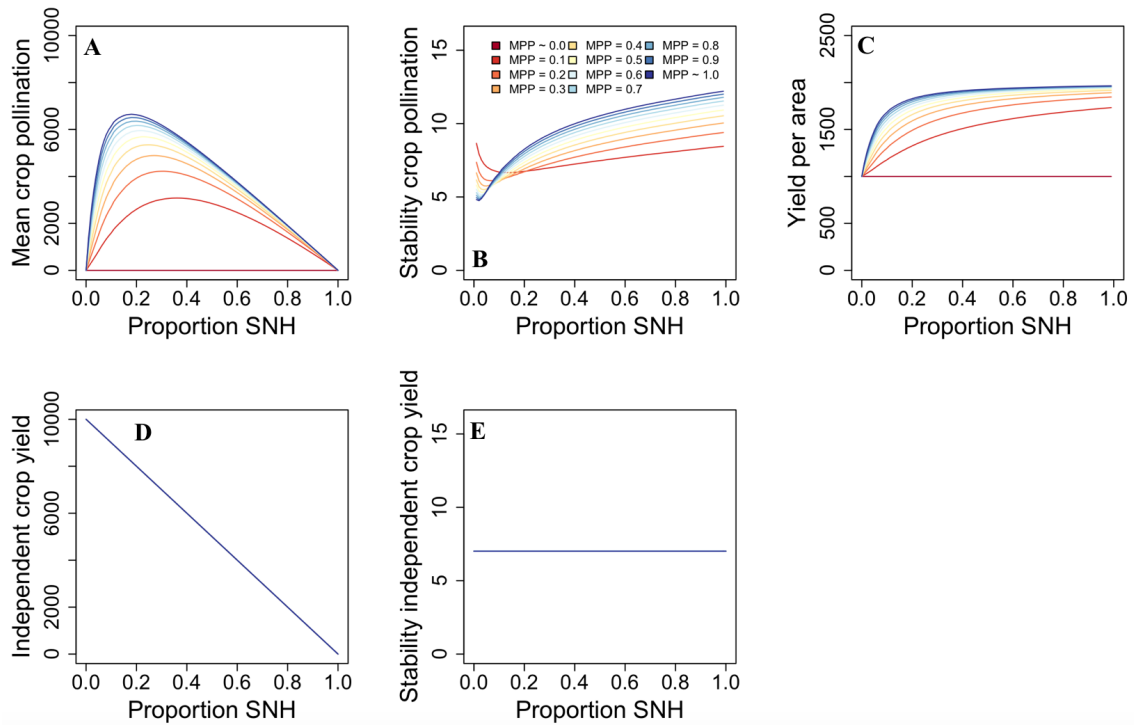

446  
447

448 The effect of MPP on crop pollination services increases with the degree to which crops  
449 depend on animal pollination. Higher pollination dependence of crops shifts maximum  
450 yields to higher fractions of seminatural habitat at landscape and local scales, and the  
451 stability of crop pollination increases faster (Figure S10).

452

453 *Biodiversity effects on crop pollination*

454 Biodiversity decreases with land conversion, but higher aggregation of seminatural  
455 fragments alleviates that loss to some extent (Figure S11). The effects of fragmentation  
456 on biodiversity are stronger at low-intermediate fractions of seminatural habitat, and are  
457 directly influenced by the dispersal distance of organisms and by their ability to live in  
458 fragmented landscapes (Figure S12). Biodiversity stabilizes crop pollination by  
459 increasing the pollinators' carrying capacity (which affects the variance of crop  
460 production, Eq. 13; Fig. 4B), and by reducing the response of crop pollination to  
461 environmental fluctuations (Fig. 4C). The former effects are stronger when biodiversity  
462 is higher, whereas the latter effects reduce variability of crop pollination especially at  
463 increasing biodiversity levels. A higher biodiversity effect (larger  $z_{kp}$ ) increases both  
464 mean crop pollination and its stability, as well as yield per area (Figure S13).

465

466

467 **Figure 4.** Effects of biodiversity on crop pollination. Plots show the response of crop  
 468 pollination services – mean and stability of crop pollination (panels **A** and **B**), and yield  
 469 per area (panel **C**) – as a function of the proportion of seminatural habitat (SNH). All  
 470 MPP values are contained within the shadows, whose limits are determined by the  
 471 minimum and maximum values across the range of MPP. Biodiversity can affect crop  
 472 pollination in a two-way manner. On one hand, biodiversity influences mean crop  
 473 pollination and yield per area by increasing the carrying capacity of pollinators ( $k_p =$   
 474  $c_{k_p} S^{z_{k_p}}$ ). On the other hand, biodiversity impacts the stability of crop production both  
 475 indirectly – increasing the carrying capacity of pollinators – and directly – reducing the  
 476 response of crop production to environmental fluctuations ( $\sigma_p^e = e_p / S^q$ ). For each  
 477 ecosystem service, the plots compare two scenarios: (i) a scenario where biodiversity has  
 478 no effect on crop pollination ( $z_{k_p} = 0, q = 0$ ), represented by the grey shadows, *versus* (ii)  
 479 a scenario where biodiversity has an effect on crop pollination ( $z_{k_p} = 0.26, q = 1/2$ ; Tilman  
 480 1999, Liang et al 2016, O’Connor et al 2017, Cardinale et al 2011), represented by the  
 481 light orange shadows. Parameter values:  $\alpha_p = \alpha_w = 0.9, \beta_p = \beta_w = 0.6, A = 10, Z_C = 1000,$   
 482  $\alpha_C = 1000, k_W = 5000, e_p = 0.8, \sigma_p^d = 0.1, \sigma_C^e = 0.03, \alpha_C = 1000,$  Pollination dependence  
 483 = 50%.

484  
 485  
 486

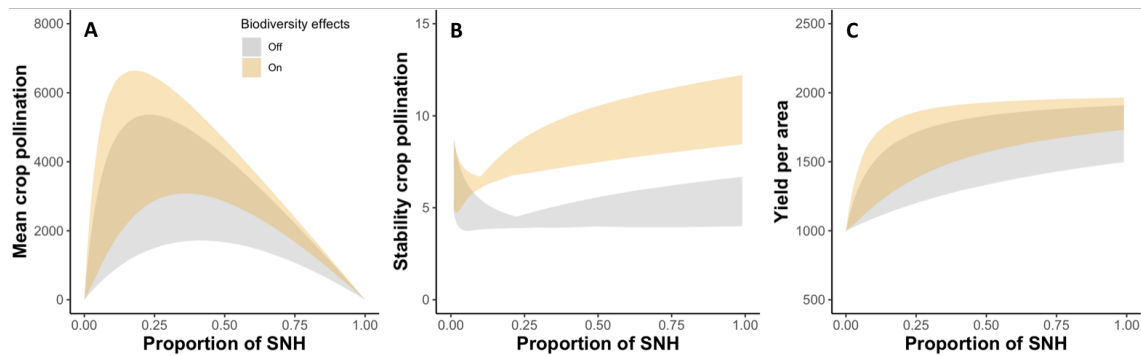

487  
 488

489 *Net effects of fragmentation on ecosystem services*

490 The fragmentation pattern of seminatural habitat has a dual effect on crop pollination  
491 services. On one hand, aggregation of seminatural fragments decreases pollination by  
492 lowering MPP (Figures S5 and S14), which in turn reduces the carrying capacity of  
493 pollinators (Eq. 14). On the other hand, aggregation increases biodiversity (especially at  
494 low-intermediate fractions of seminatural habitat; Figure S11), which in turn increases  
495 pollinators' biomass (through its positive effects on pollinators' carrying capacity) and  
496 the service of pollination (Figure S14). The net effect of fragmentation on ecosystem  
497 service supply depends on the distance-decay of ecosystem service flow ( $d_m$ ) and the  
498 proportion of seminatural habitat remaining. When the decay distance  $d_m$  is low (Figure  
499 5, first row), fragmentation effects tend to be positive for mean crop pollination and yield  
500 per area because the fraction of crop land within reach from non-crop land areas is higher  
501 (this fraction is lower at very low fractions of seminatural land). Yet, crop pollination  
502 stability decreases due to the lower biodiversity levels in fragmented landscapes, except  
503 at high fractions of seminatural habitat where the impact of fragmentation is minimum.  
504 Conversely, when the decay distance  $d_m$  is high, seminatural fragments are perceived as  
505 more connected and ecosystem service supply is not limited by space. In this case,  
506 fragmentation becomes irrelevant, or even negative, due to the lower biodiversity levels  
507 in fragmented landscapes (Figure 5).

508

509



510 **Figure 5.** Net effects of aggregation on crop pollination services. Columns represent,  
 511 from left to right, mean and stability of crop pollination, and yield per area. Ecosystem  
 512 services are plotted as a function of fragmentation for different proportion of seminatural  
 513 habitat or SNH (as opposed to figures 3-4). Fragmentation increases in the x-axis from  
 514 left to right (we set  $w = m$  for simplicity; higher  $w, m$  means more aggregation). Darker  
 515 lines correspond to lower fractions of seminatural habitat, which are more typical of  
 516 intensive farming systems. Rows represent increasing values of the decay distance  $d_m$   
 517 (0.5, 1, 5). Parameter values:  $\alpha_P = \alpha_W = 0.9$ ,  $\beta_P = \beta_W = 0.6$ ,  $A = 10$ ,  $Z_C = 1000$ ,  $\alpha_C = 1000$ ,  
 518  $k_W = 5000$ ,  $e_P = 0.8$ ,  $\sigma_P^d = 0.1$ ,  $\sigma_C^e = 0.03$ ,  $\alpha_C = 1000$ , Pollination dependence = 50%,  $z_{k_P} =$   
 519 0.26.  
 520  
 521

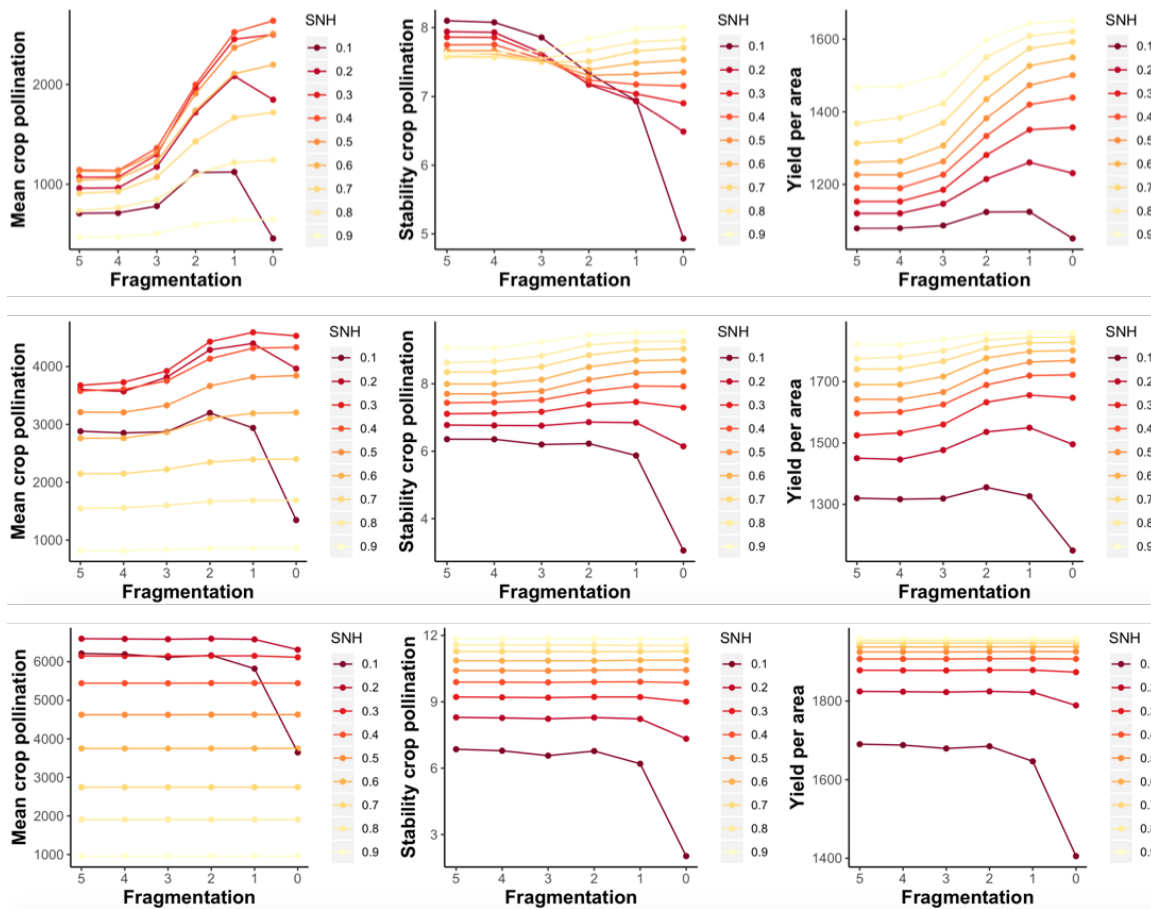

522  
 523

## 524 DISCUSSION

525

526 Our analysis reveals a variety of effects of land conversion on biodiversity and crop  
527 production in intensive crop pollination systems. Using a mean-field approximation of  
528 various ecosystem services in spatially-explicit agricultural landscapes, our model  
529 suggests that (1) fragmentation impacts food production through spatial and biodiversity-  
530 mediated effects; (2) the full complexity of the fragmentation-induced spatial effects on  
531 ecosystem service supply, irrespective of the specific pattern of land conversion, is  
532 captured by one factor – the mean pollination potential of the remaining seminatural land  
533 (MPP) – which determines the mean and stability of pollination services; (3) biodiversity  
534 can have a stabilizing effect on crop pollination in fragmented agricultural landscapes;  
535 and (4) the net effects of fragmentation on food production depend on the strength of the  
536 spillover of pollinators to crop land and the degree to which crops depend on animal  
537 pollination.

538

539 The loss of seminatural land has contrasting effects on the ecosystem services considered:  
540 biodiversity decreases, independent crop production increases, while crop pollination is  
541 maximized at intermediate fractions of seminatural habitat. But fragmentation can modify  
542 these relationships in two ways. On one hand, land conversion can produce multiple  
543 patterns of aggregation of the remaining fragments of seminatural habitat. These patterns  
544 combined with the strength of the spillover of pollinators to crop land determine the mean  
545 pollination potential of seminatural land (MPP), which is the main responsible of food  
546 production in pollination-dependent agriculture. The second type of effects are mediated  
547 by biodiversity, as the level of aggregation of the remaining fragments of seminatural  
548 habitat affects the pollinator richness. Such purely spatial and biodiversity-mediated  
549 effects modify the carrying capacities of pollinators, which ultimately determine crop  
550 pollination services. The mean-field approximation shows that the effects of space on  
551 crop production can be interpreted in the same terms as varying the pollinator's carrying  
552 capacity in the non-spatial model<sup>20</sup>.

553

554 Our results suggest that understanding the factors that affect MPP is a fundamental step  
555 towards food security. If no restrictions exist in the flow of pollinators to crop land, MPP  
556 is maximum and the spatial structure of land conversion does not affect crop yield  
557 dynamics. In this situation, seminatural fragments are perceived as more connected and  
558 the provision and stability of crop pollination is not conditioned by space, i.e. spatial and  
559 non-spatial models converge. However, agricultural landscapes are fragmented to some  
560 extent and the foraging ranges of most organisms are local (200 m for small bee species,  
561 25–110 m for bumble bees, >200 m for certain bee species<sup>53-56</sup>), which produces higher  
562 aggregation and weaker spillover effects, thus reducing MPP. Such reductions in MPP  
563 affect crop yields by (i) decreasing mean crop pollination and total yield per area, and (ii)  
564 decreasing yield stability along the gradient of seminatural habitat. The estimation of  
565 MPP in real farming systems would require data on the aggregation level of seminatural  
566 habitat fragments within the agricultural landscape, and on the spillover of pollinators to  
567 adjacent crops. The former can be obtained with GIS processing of aerial pictures or  
568 satellite images of agricultural landscapes. For the latter, information on foraging  
569 distances of pollinator species combined with experimental studies could be used to  
570 reveal species' foraging patterns and how the flow of pollinators to adjacent crop land  
571 decays with distance (e.g.<sup>16,36,37-39</sup>). This information will be useful to design agricultural  
572 landscapes for high MPP.

573

574 Producing food requires land, and increasing the land devoted to farming reduces the land  
575 devoted to biodiversity conservation. Our results agree with recent empirical studies  
576 showing that higher pollinator diversity increases food production<sup>6</sup>, and further suggest  
577 that it can lead to lower variability in agricultural productivity. The response of  
578 biodiversity to land conversion depends on the amount and the spatial structure of  
579 seminatural habitat loss. For example, although the effects of fragmentation on  
580 biodiversity are stronger at low-intermediate fractions of seminatural habitat – typical of  
581 intensive farming systems –, aggregation increases the biodiversity levels within  
582 seminatural habitat fragments. The stabilizing effect of biodiversity and its role in food  
583 security is increasingly supported, even at crop levels<sup>12</sup>. Our results add to this view and  
584 point to biodiversity conservation as one key policy to achieve food security.

585  
586 Our findings are consistent with previous studies that found non-linear effects of  
587 fragmentation on ecosystem service provision (e.g.<sup>18,19</sup>), and provide a theoretical basis  
588 of the effects of fragmentation on the stability patterns of crop pollination. Fragmentation  
589 has a dual effect on crop production services. On one hand, aggregation decreases crop  
590 pollination by reducing MPP. On the other hand, aggregation increases crop pollination  
591 by maintaining higher biodiversity, especially at low-intermediate fractions of  
592 seminatural habitat. The net effects of aggregation on crop pollination depend on the  
593 strength of spillover effects. These results have management implications (e.g. land  
594 sharing–sparing debate<sup>57,58</sup>), as the goals of different landscape managers can be  
595 conditioned by the way that natural land is converted into crops. For example,  
596 maintaining a large number of seminatural fragments may be a better strategy at multiple  
597 spatial scales than maintaining a few large fragments when pollinator flow to crop land  
598 is low. Yet, this strategy may increase the temporal variability of crop pollination at low-  
599 intermediate proportions of seminatural habitat, reflecting a trade-off between ecosystem  
600 service mean and stability. Conversely, larger fragments of seminatural habitat have  
601 higher pollinator diversity when the fraction of seminatural habitat is low or intermediate,  
602 and higher biodiversity can stabilize crop pollination. These results agree with recent  
603 claims that the land sharing–sparing dichotomy lends itself to overly simplistic policy  
604 prescriptions<sup>59</sup>, and suggest that management decisions for food security should consider  
605 factors such as the distance-decay of pollinator flow, the amount and spatial aggregation  
606 of seminatural habitat and the degree to which crops depend on animal pollination.

607  
608 Our model has several limitations. For example, our model focuses on intensive farming  
609 systems, where crop land does not host important biodiversity levels; other types of  
610 agriculture – e.g. organic farming, wildlife-friendly practices – allow moderate levels  
611 biodiversity to thrive within crop land, and can modify the results reported here<sup>60</sup>. Second,  
612 the observation that biodiversity loss has either none (stability) or positive (mean) effects  
613 on independent crop yield may change if organisms responsible for other services, i.e.  
614 pest control, are included. Besides, although we do not find any effect of seminatural  
615 habitat on the stability of independent crop yield, this may change if environmental  
616 stochasticity of crops increases with decreasing amounts of seminatural habitat, as  
617 suggested by studies linking seminatural habitat to climate regulation, natural hazard  
618 regulation and water flow regulation services<sup>61</sup>. Finally, our model focuses on wild  
619 central-place pollinators (i.e. all types of wild bees, including bumble bees and solitary  
620 bees), whose presence and abundance directly depend on the amount of seminatural  
621 habitat<sup>32</sup>, which provides shelter and habitat for these insects. Honey bee colonies are  
622 used to substitute wild pollinator communities, yet the pollination services of wild  
623 pollinators cannot be compensated by managed bees because (1) pollinator-dependent

624 crop land grows more rapidly than the stock of, e.g., honey bee colonies<sup>62</sup>, (2) wild insects  
625 usually pollinate crops more efficiently than honey bees<sup>31</sup>, and (3) honey bees may  
626 depress wild pollinator densities<sup>63</sup>. Despite other groups of pollinators exist, wild central-  
627 place foragers remain a very important group of crop pollinators in agriculturally  
628 dominated landscapes<sup>64,65</sup>.

629

630 Ensuring stable food supplies is one of the 2017 UN Sustainable Development Goals, and  
631 is a challenge that may require multiple solutions. Policies to increase yields, changing  
632 diets, irrigation, crop diversity, tolerance of crops to drought, among others, have been  
633 proposed as stability-enhancing solutions<sup>12,27,66-68</sup>. Our study sheds new light in this  
634 debate by showing that high and stable yields in crop pollination systems depend on  
635 biodiversity and the spatial structure of the agricultural landscape, i.e. fragmentation.  
636 Fragmentation can produce spatial and biodiversity-mediated effects with the potential to  
637 modify the mean and stability of pollination-dependent crop production, which has strong  
638 consequences for food production and food security. These results are highly relevant  
639 given the worldwide trends in agriculture, which shifts towards more pollinator-  
640 dependent crops<sup>29,30</sup>.

641

642 **REFERENCE LIST**

643

644

645 1. United Nations Sustainable Development Goals. [http://www.un.org/sustainabledevelopment/](http://www.un.org/sustainabledevelopment/sustainable-development-goals/)  
646 [sustainable-development-goals/](http://www.un.org/sustainable-development-goals/) (2017).

647 2. Hooper, D.U. *et al.* Effects of biodiversity on ecosystem functioning: a consensus of current knowledge.  
648 *Ecol. Monogr.* **75**, 3-35 (2005).

649 3. Balvanera, P. *et al.* Quantifying the evidence for biodiversity effects on ecosystem functioning and  
650 services. *Ecol. Lett.* **9**, 1146-1156 (2006).

651 4. Cardinale, B. J. *et al.* Biodiversity loss and its impact on humanity. *Nature* **486**, 59–67 (2012).

652 5. Lefcheck, J. S. *et al.* Biodiversity enhances ecosystem multifunctionality across trophic levels and  
653 habitats. *Nat. Commun.* **6**, 6936 (2015).

654 6. Woodcock, B. A. *et al.* Meta-analysis reveals that pollinator functional diversity and abundance  
655 enhance crop pollination and yield. *Nat. Commun.* **10**, 1481 (2019).

656 7. Loreau, M., Mouquet, N. & Gonzalez, A. *et al.* Biodiversity as spatial insurance in heterogeneous  
657 landscapes. *Proc. Natl. Acad. Sci. U.S.A.* **100**, 12765-12770 (2003).

658 8. Giorgi, F. *et al.* Regional climate information-evaluation and projections. In Houghton, J. *et al.* (Eds.),  
659 *Climate change 200 the scientific basis. Contribution of working group I to the third assessment report,*  
660 *intergovernmental panel on climate change* (pp. 583-638). Cambridge Univ. Press, Cambridge, UK  
661 (2001).

662 9. Li, C. Y. & Xian, P. Atmospheric anomalies related to interdecadal variability of SST in the North  
663 Pacific. *Adv. Atmos. Scie.* **8**, 258-273 (2003).

664 10. Saltz, D., Rubenstein, D. I. & White, G. C. The impact of increased environmental stochasticity due to  
665 climate change on the dynamics of Asiatic wild ass. *Conserv. Biol.* **20**, 1402-1409 (2006).

666 11. Fischer, E. M., Beyerle, U. & Knutti, R. Robust spatially aggregated projections of climate extremes.  
667 *Nature Climate Change* **3**, 1033-8 (2013).

668 12. Renard, D. & Tilman, D. National food production stabilized by crop diversity. *Nature* **571**, 257-260  
669 (2019).

670 13. Ewers, R. M & Didham, R. K. Confounding factors in the detection of species responses to habitat  
671 fragmentation. *Biol. Rev.* **81**, 117–42 (2006).

672 14. Haddad, N. M. *et al.* Habitat fragmentation and its lasting impact on Earth’s ecosystems. *Sci. Adv.* **1**  
673 e1500052 (2015).

674 15. Rybicki, J., Abrego, N. & Ovaskainen, O. Habitat fragmentation and species diversity in competitive  
675 communities. *Ecol. Lett.* **23**, 506-517 (2020).

676 16. Rand, T. A., Tylianakis, J. M. & Tscharntke, T. Spillover edge effects: the dispersal of agriculturally  
677 subsidized insect natural enemies into adjacent natural habitats *Ecol. Lett.* **9**, 603–14 (2006).

678 17. Brosi, B. J., Armsworth, P. R. & Daily, G. C. Optimal design of agricultural landscapes for pollination  
679 services. *Conserv. Lett.* **1**, 27–36 (2008).

680 18. Keitt, T. H. Habitat conversion, extinction thresholds and pollination services in agroecosystems. *Ecol.*  
681 *Appl.* **19**, 1561–1573 (2009).

682 19. Mitchell, M. G. E., Bennett, E. M. & Gonzalez, A. Strong and non-linear effects of fragmentation on  
683 ecosystem service provision at multiple scales. *Environ. Res. Lett.* **10**, 094014 (2015).

684 20. Montoya, D. *et al.* Trade-offs in provisioning and stability of multiple ecosystem services in  
685 agroecosystems. *Ecol. Appl.* **29**, e01853 (2019).

686 21. Braat, L. & ten Brink, P. (eds.) *The Cost of Policy Inaction: The case of not meeting the 2010*  
687 *biodiversity target.* Wageningen, Alterra, Alterra-rapport 1718 (2008).

688 22. Garibaldi, L.A., Aizen, M. A., Klein, A. M., Cunningham, S. A. & Harder, L. D. Global growth and  
689 stability of agricultural yield decrease with pollinator dependence. *Proc. Natl. Acad. Sci. U.S.A.* **108**,  
690 5909-5914 (2011a).

691 23. Garibaldi, L.A. *et al.* Stability of pollination services decreases with isolation from natural areas despite  
692 honey bee visits. *Ecol. Lett.* **14**, 1062-1072 (2011b).

693 24. Garibaldi, L.A. *et al.* From research to action: enhancing crop yield through wild pollinators. *Front.*  
694 *Ecol. Environ.* **12**, 439–447 (2014).

695 25. Deguines, N. *et al.* Large-scale trade-off between agricultural intensification and crop pollination  
696 services. *Front. Ecol. Environ.* **12**, 212-217 (2014).

697 26. Montoya, D., Gaba, S., de Mazancourt, C., Bretagnolle, V. & Loreau, M. Reconciling biodiversity  
698 conservation, food production and farmers’ demand in agricultural landscapes. *Ecol. Modell.* **416**,  
699 108889 (2020).

700 27. Godfray, H. C. J. & Garnett, T. Food security and sustainable intensification. *Phil. Trans. R. Soc. B* **369**,  
701 20120273 (2014).

- 702 28. Schmidhuber J. & Tubiello F. N. Global food security under climate change. *P. Natl. Acad. Sci. USA*  
703 **104**, 19703–19708 (2007).
- 704 29. Aizen, M. A., Garibaldi, L. A., Cunningham, S. A. & Klein, A. M. How much does agriculture depend  
705 on pollinators? Lessons from long-term trends in crop production. *Ann. Bot.* **103**, 1579–1588 (2009)
- 706 30. Breeze, T. D. *et al.* Agricultural policies exacerbate honeybee pollination service supply-demand  
707 mismatches across Europe. *PLoS ONE* **9**, e82996 (2014).
- 708 31. Garibaldi, L. A. *et al.* Wild pollinators enhance fruit set of crops regardless of honey bee abundance.  
709 *Science* **339**, 1608–1611 (2013).
- 710 32. Kleijn, D. *et al.* Delivery of crop pollination services is an insufficient argument for wild pollinator  
711 conservation. *Nat. Commun.* **6**, 7414 (2015).
- 712 33. Thebault, E. & Fontaine, C. Stability of ecological communities and the architecture of mutualistic and  
713 trophic networks. *Science* **329**, 853–856 (2010).
- 714 34. Holland, J. N., Y. Wang, S. Shan & DeAngelis, D. L. Consumer–resource dynamics of indirect  
715 interactions in a mutualism–parasitism food web module. *Theor. Ecol.* **6**, 475–493 (2013).
- 716 35. Holland, J. N. Population ecology of mutualism. Pages 133–158 in J. Bronstein, editor. *Mutualism*.  
717 Oxford University Press, Oxford, UK (2015).
- 718 36. Duelli, P., Studer, M., Marchand, I. & Jakob, S. Population movements of arthropods between natural  
719 and cultivated areas. *Biol. Conserv.* **54**, 193–207 (1990).
- 720 37. Ries, L., Fletcher, R. J. Jr, Battin, J. & Sisk, T. D. Ecological responses to habitat edges: mechanisms,  
721 models, and variability explained. *Annu. Rev. Ecol. Evol. Syst.* **35**, 491–522 (2004).
- 722 38. Ricketts, T. H. *et al.* Landscape effects on crop pollination services: are there general patterns? *Ecol.*  
723 *Lett.* **11**, 499–515 (2008).
- 724 39. Ricketts, T. H. & Lonsdorf, E. Mapping the margin: comparing marginal values of tropical forest  
725 remnants for pollination services *Ecol. Appl.* **23**, 1113–23 (2013).
- 726 40. Farwig, N. *et al.* Isolation from forest reduces pollination, seed predation and insect scavenging in Swiss  
727 farmland *Landscape Ecol.* **24**, 919–27 (2009).
- 728 41. Mitchell, M. G. E., Bennett, E. M. & Gonzalez, A. Forest fragments modulate the provision of multiple  
729 ecosystem services. *J. Appl. Ecol.* **51**, 909–18 (2014).
- 730 42. Martins, K. T., Gonzalez, A. & Lechowicz, M. J. Pollination services are mediated by bee functional  
731 diversity and landscape context. *Agric. Ecosyst. Environ.* **200**, 12–20 (2015).
- 732 43. Lande, R., S. Engen & B.-E. Saether. *Stochastic population dynamics in ecology and conservation*.  
733 Oxford University Press, Oxford, UK (2003).
- 734 44. Fletcher, R. J. *et al.* Is habitat fragmentation good for biodiversity? *Biol. Conserv.* **226**, 9–15 (2018).
- 735 45. Fahrig, L. *et al.* Is habitat fragmentation bad for biodiversity? *Biol. Conserv.* **230**, 179–186 (2018).
- 736 46. Watling, J. I. *et al.* Support for the habitat amount hypothesis from a global synthesis of species density  
737 studies. *Ecol. Lett.* **23**, 674–681 (2020).
- 738 47. Hanski, I., Zurita, G. A., Bellocq, M. I. & Rybicki, J. Species-fragmented area relationship. *Proc. Natl*  
739 *Acad. Sci.* **110**, 12715–12720 (2013).
- 740 48. Crawley, M. J. & Harral, J. E. Scale dependence in plant biodiversity. *Science* **291**, 864–868 (2001).
- 741 49. Cardinale, B. J. *et al.* The functional role of producer diversity in ecosystems. *Am. J. Bot.* **98**, 572–592  
742 (2011).
- 743 50. Liang, J. *et al.* Positive biodiversity-productivity relationship predominant in global forests. *Science*  
744 **354**, aaf8957 (2016).
- 745 51. O’Connor, M. *et al.* A general biodiversity-function relationship is mediated by trophic level. *Oikos*  
746 **126**, 18–31 (2016).
- 747 52. Tilman, D. The ecological consequences of changes in biodiversity: a search for general principles.  
748 *Ecology* **80**, 1455–1474 (1999).
- 749 53. Darvill, B., Knight, M. E. & Goulson, D. Use of genetic markers to quantify bumblebee foraging range  
750 and nest densit. *Oikos* **107**, 471–478 (2004).
- 751 54. Wolf, S. & Moritz, R. F. A. Foraging distance in *Bombus terrestris* L. (Hymenoptera: Apidae).  
752 *Apidologie* **39**, 419–427 (2008).
- 753 55. Zurbuchen, A. *et al.* Maximum foraging ranges in solitary bees: only few individuals have the capability  
754 to cover long foraging distances. *Biol. Conserv.* **143**, 669–676 (2010).
- 755 56. Geib, J. C., J. P. Strange & Galenj, C. Bumble bee nest abundance, foraging distance, and host-plant  
756 reproduction: implications for management and conservation. *Ecol. Appl.* **25**, 768–778 (2015).
- 757 57. Fischer, J., Abson, D. J., Butsic, V. Chappell, M. J., Ekroos, J. *et al.* Land sparing versus land sharing:  
758 moving forward. *Conserv. Lett.* **7**, 149–157 (2014).
- 759 58. Grass, I. *et al.* Land-sharing/-sparing connectivity landscapes for ecosystem services and biodiversity  
760 conservation. *People & Nature* **1**, 262–272 (2019).

- 761 59. Kremen, C. Reframing the land-sparing/land-sharing debate for biodiversity conservation. *Ann. N.Y.*  
762 *Acad. Sci.* **1355** (2015).
- 763 60. Clough, Y. *et al.* Combining high biodiversity with high yields in tropical agroforests. *Proc. Natl. Acad.*  
764 *Sci. U.S.A.* **108**, 8311–8316 (2011).
- 765 61. Harrison, P. A. *et al.* Identifying and prioritizing services in European terrestrial and freshwater  
766 ecosystems. *Biodiv. Conserv.* **19**, 2791–2821 (2010).
- 767 62. Lindström, S. A. M., L. Herbertsson, M. Rundolf, R. Bommarco & Smith, H. G. Experimental  
768 evidence that honeybees depress wild insect densities in a flowering crop. *Proc. Roy Soc. Lond. B*  
769 **283**, 20161641 (2016).
- 770 63. Winfree, R., Williams, N. M., Dushoff, J. & Kremen, C. Native bees provide insurance against ongoing  
771 honey bee losses. *Ecol. Lett.* **10**, 1105–1113 (2007).
- 772 64. Roulston, T. H. & Goodell, K. The role of resources and risks in regulating wild bee populations. *Annu.*  
773 *Rev. Entomol.* **56**, 293–312 (2011).
- 774 65. Potts, S.G. Safeguarding pollinators and their values to human well-being. *Nature* **540**, 220–229 (2016).
- 775 66. Rosenzweig, C. & Parry, M. L. Potential impact of climate change on world food supply. *Nature* **367**,  
776 133–138 (1994).
- 777 67. Lobell, D. B. *et al.* Prioritizing climate change adaptation needs for food security in 2030. *Science* **319**,  
778 607–610 (2008).
- 779 68. Bailey, R. *et al.* *Extreme Weather and Resilience of the Global Food System. Final Project Report from*  
780 *the UK–US Taskforce on Extreme Weather and Global Food System Resilience*  
781 <https://www.foodsecurity.ac.uk/publications/archive/page/4>; The Global Food Security Programme  
782 (2015).
- 783 69. R Core Team. R: A language and environment for statistical computing. R Foundation for Statistical  
784 Computing, Vienna, Austria. <https://www.R-project.org/> (2017).
- 785

786 **Acknowledgements**

787

788 DM was funded by the EU and INRA in the framework of the Marie-Curie FP7 COFUND  
789 People Program, through the award of an AgreeSkills/AgreeSkills+ fellowship, and by  
790 and the FRAGCLIM Consolidator Grant, funded by the European Research Council  
791 under the European Union's Horizon 2020 research and innovation programme (grant  
792 agreement number 726176). This work was supported by the TULIP Laboratory of  
793 Excellence (ANR-10-LABX-41) and by the BIOTASES Advanced Grant funded by the  
794 European Research Council under the European Union's Horizon 2020 research and  
795 innovation program (grant agreement no. 666971).

796

797

798 **Author contributions**

799

800 D.M., B.H. and M.L. conceived the original idea and designed the research. D.M. and  
801 B.H. designed the model, with help from M.L. and C.M. D.M. and B.H. performed the  
802 analysis. D.M. wrote the first draft of the manuscript, all authors contributed to revisions.

803

804

805 **Additional information**

806

807 Supplementary Methods (3)

808 Supplementary Tables (1)

809 Supplementary Figures (15)

810

811

812 **Competing interests**

813

814 The authors declare no competing financial interests.

815
